# Supplementary material for: Genetic and Molecular Characterization of the Immortalized Murine Hepatic Stellate Cell Line GRX
Source: MDPI journal article supplement (doi:10.3390/cells11091504), 2022-04-30
Supplement: s1 [file Table S1.pdf › Table S1.pdf]

**Table S1.** Publications using or mentioning GRX cells

| S/N | Year of publication | Reference                                                                                                                                                                                                                                                                     | Type of paper | Origin of publication |
|-----|---------------------|-------------------------------------------------------------------------------------------------------------------------------------------------------------------------------------------------------------------------------------------------------------------------------|---------------|-----------------------|
| 1   | 1985                | Borojevic R, Monteiro AN, Vinhas SA, Domont GB, Mourão PA, Emonard H, Grimaldi G Jr, Grimaud JA. Establishment of a continuous cell line from fibrotic schistosomal granulomas in mice livers. <i>In Vitro Cell Dev Biol.</i> 1985;21(7):382-390. doi: 10.1007/BF02623469     | Original      | Brazil                |
| 2   | 1989                | Margis R, Borojevic R. Retinoid-mediated induction of the fat-storing phenotype in a liver connective tissue cell line (GRX). <i>Biochim Biophys Acta</i> 1989;1011(1):1-5. doi: 10.1016/0167-4889(89)90069-4                                                                 | Original      | Brazil                |
| 3   | 1990                | Borojevic R, Guaragna RM, Margis R, Dutra HS. In vitro induction of the fat-storing phenotype in a liver connective tissue cell line-GRX. <i>In Vitro Cell Dev Biol.</i> 1990;26(4):361-368. doi: 10.1007/BF02623827                                                          | Original      | Brazil                |
| 4   | 1990                | Silva LC, Borojevic R, Mourão PA. Identification of cells responsible for synthesis of sulphated glycosaminoglycans in schistosome-induced hepatic granulomas. <i>Int J Exp Pathol.</i> 1990;71(6):845-856. PMID: 2126187                                                     | Original      | Brazil                |
| 5   | 1991                | Guaragna RM, Trugo L, Borojevic R. Neutral lipid synthesis and accumulation during in vitro induction of the lipocyte phenotype in hepatic connective tissue cells. <i>Biochim Biophys Acta</i> 1991;1085(1):29-34. doi: 10.1016/0005-2760(91)90228-a                         | Original      | Brazil                |
| 6   | 1992                | Margis R, Pinheiro-Margis M, da Silva LC, Borojevic R. Effects of retinol on proliferation, cell adherence and extracellular matrix synthesis in a liver myofibroblast or lipocyte cell line (GRX). <i>Int J Exp Pathol.</i> 1992;73(2):125-135. PMID: 1571273                | Original      | Brazil                |
| 7   | 1992                | Pinheiro-Margis M, Margis R, Borojevic R. Collagen synthesis in an established liver connective tissue cell line (GRX) during induction of the fat-storing phenotype. <i>Exp Mol Pathol.</i> 1992;56(2):108-118. doi: 10.1016/0014-4800(92)90028-a                            | Original      | Brazil                |
| 8   | 1992                | Silva LC, Borojevic R, Mourão PA. Proteoglycans synthesized by the hepatic granulomas isolated from schistosome-infected mice and by the granuloma-derived connective tissue cell lines. <i>Biochim Biophys Acta</i> 1992;1139(1-2):96-104. doi: 10.1016/0925-4439(92)90088-5 | Original      | Brazil                |
| 9   | 1992                | Guaragna RM, Trugo L, Borojevic R. Phospholipid modifications during conversion of hepatic myofibroblasts into lipocytes (Ito-cells). <i>Biochim Biophys Acta</i> 1992;1128(2-3):237-243. doi: 10.1016/0005-2760(92)90313-k                                                   | Original      | Brazil                |
| 10  | 1995                | Monteiro AN, Geremias AT, Borojevic R. Clonal heterogeneity in murine liver myofibroblasts. <i>Braz J Med Biol Res.</i> 1995;28(4):457-466. PMID: 8520543                                                                                                                     | Original      | Brazil                |
| 11  | 1998                | Vicente CP, Fortuna VA, Margis R, Trugo L, Borojevic R. Retinol uptake and metabolism, and cellular retinol binding protein expression in an in vitro model of hepatic stellate cells. <i>Mol Cell Biochem.</i> 1998;187(1-2):11-21. doi: 10.1023/a:1006886308490             | Original      | Brazil                |
| 12  | 1999                | Kato M, Iwamoto H, Higashi N, Sugimoto R, Uchimura K, Tada S, Sakai H, Nakamuta M, Nawata H. Role of Rho small GTP binding protein in the regulation of actin cytoskeleton in hepatic stellate cells. <i>J Hepatol.</i> 1999;31(1):91-99. doi: 10.1016/s0168-8278(99)80168-8  | Original      | Japan                 |
| 13  | 2001                | Geerts A. History, heterogeneity, developmental biology, and functions of quiescent hepatic stellate cells. <i>Semin Liver</i>                                                                                                                                                | Review        | UK                    |

|    |      |                                                                                                                                                                                                                                                                                                                                                |          |                 |
|----|------|------------------------------------------------------------------------------------------------------------------------------------------------------------------------------------------------------------------------------------------------------------------------------------------------------------------------------------------------|----------|-----------------|
|    |      | Dis. 2001;21(3):311-335. doi: 10.1055/s-2001-17550                                                                                                                                                                                                                                                                                             |          |                 |
| 14 | 2001 | Guma FCR, Mello TG, Mermelstein CS, Fortuna VA, Wofchuk ST, Gottfried C, Guaragna RM, Costa ML, Borojevic R. Intermediate filaments modulation in an in vitro model of the hepatic stellate cell activation or conversion into the lipocyte phenotype. <i>Biochem Cell Biol.</i> 2001;79(4):409-417. PMID: 11527210                            | Original | Brazil          |
| 15 | 2001 | Mermelstein CS, Guma FC, Mello TG, Fortuna VA, Guaragna RM, Costa ML, Borojevic R. Induction of the lipocyte phenotype in murine hepatic stellate cells: reorganisation of the actin cytoskeleton. <i>Cell Tissue Res.</i> 2001;306(1):75-83. doi: 10.1007/s004410100428                                                                       | Original | Brazil          |
| 16 | 2001 | Fortuna VA, Trugo LC, Borojevic R. Acyl-CoA: retinol acyltransferase (ARAT) and lecithin:retinol acyltransferase (LRAT) activation during the lipocyte phenotype induction in hepatic stellate cells. <i>J Nutr Biochem.</i> 2001;12(11):610-621. doi: 10.1016/s0955-2863(01)00179-6                                                           | Original | Brazil          |
| 17 | 2003 | Andrade CM, Trindade VM, Cardoso CC, Ziulkoski AL, Trugo LC, Guaragna RM, Borojevic R, Guma FC. Changes of sphingolipid species in the phenotype conversion from myofibroblasts to lipocytes in hepatic stellate cells. <i>J Cell Biochem.</i> 2003;88(3):533-544. doi: 10.1002/jcb.1037                                                       | Original | Brazil          |
| 18 | 2003 | da Silva FM, Guimarães EL, Grivicich I, Trindade VM, Guaragna RM, Borojevic R, Guma FC. Hepatic stellate cell activation in vitro: cell cycle arrest at G2/M and modification of cell motility. <i>J Cell Biochem.</i> 2003;90(2):387-396. doi: 10.1002/jcb.10642                                                                              | Original | Brazil          |
| 19 | 2003 | Fortuna VA, Martucci RB, Trugo LC, Borojevic R. Hepatic stellate cells uptake of retinol associated with retinol-binding protein or with bovine serum albumin. <i>J Cell Biochem.</i> 2003;90(4):792-805. doi: 10.1002/jcb.10703                                                                                                               | Original | Brazil          |
| 20 | 2004 | Martucci RB, Ziulkoski AL, Fortuna VA, Guaragna RM, Guma FC, Trugo LC, Borojevic R. Beta-carotene storage, conversion to retinoic acid, and induction of the lipocyte phenotype in hepatic stellate cells. <i>J Cell Biochem.</i> 2004;92(2):414-423. doi: 10.1002/jcb.20073                                                                   | Original | Brazil          |
| 21 | 2007 | Van de Bovenkamp M, Groothuis GM, Meijer DK, Olinga P. Liver fibrosis in vitro: cell culture models and precision-cut liver slices. <i>Toxicol In Vitro.</i> 2007;21(4):545-557. doi: 10.1016/j.tiv.2006.12.009                                                                                                                                | Review   | The Netherlands |
| 22 | 2007 | Herrmann J, Gressner AM, Weiskirchen R. Immortal hepatic stellate cell lines: useful tools to study hepatic stellate cell biology and function? <i>J Cell Mol Med.</i> 2007;11(4):704-722. doi: 10.1111/j.1582-4934.2007.00060.x                                                                                                               | Review   | Germany         |
| 23 | 2007 | Guimarães EL, Franceschi MF, Andrade CM, Guaragna RM, Borojevic R, Margis R, Bernard EA, Guma FC. Hepatic stellate cell line modulates lipogenic transcription factors. <i>Liver Int.</i> 2007;27(9):1255-1264. doi: 10.1111/j.1478-3231.2007.01578.x                                                                                          | Original | Brazil          |
| 24 | 2008 | Friedman SL. Hepatic stellate cells: protean, multifunctional, and enigmatic cells of the liver. <i>Physiol Rev.</i> 2008;88(1):125-172. doi: 10.1152/physrev.00013.20                                                                                                                                                                         | Review   | USA             |
| 25 | 2008 | Andrade CM, Roesch GC, Wink MR, Guimarães EL, Souza LF, Jardim FR, Guaragna RM, Bernard EA, Margis R, Borojevic R, Battastini AM, Guma FC. Activity and expression of ecto-5'-nucleotidase/CD73 are increased during phenotype conversion of a hepatic stellate cell line. <i>Life Sci.</i> 2008;82(1-2):21-29. doi: 10.1016/j.lfs.2007.10.003 | Original | Brazil          |
| 26 | 2008 | Souza IC, Martins LA, Coelho BP, Grivicich I, Guaragna RM, Gottfried C, Borojevic R, Guma FC. Resveratrol inhibits cell growth by inducing cell cycle arrest in activated hepatic stellate cells. <i>Mol Cell Biochem.</i> 2008;315(1-2):1-7. doi:                                                                                             | Original | Brazil          |

|    |      |                                                                                                                                                                                                                                                                                                                                       |          |              |
|----|------|---------------------------------------------------------------------------------------------------------------------------------------------------------------------------------------------------------------------------------------------------------------------------------------------------------------------------------------|----------|--------------|
|    |      | 10.1007/s11010-008-9781-x                                                                                                                                                                                                                                                                                                             |          |              |
| 27 | 2009 | Karlmark KR, Weiskirchen R, Zimmermann HW, Gassler N, Ginhoux F, Weber C, Merad M, Luedde T, Trautwein C, Tacke F. Hepatic recruitment of the inflammatory Gr1 <sup>+</sup> monocyte subset upon liver injury promotes hepatic fibrosis. <i>Hepatology</i> 2009;50(1):261-274. doi: 10.1002/hep.22950                                 | Original | Germany      |
| 28 | 2009 | Andrade CM, Wink MR, Margis R, Borojevic R, Battastini AM, Guma FC. Activity and expression of ecto-nucleotide pyrophosphate/phosphodiesterases in a hepatic stellate cell line. <i>Mol Cell Biochem.</i> 2009;325(1-2):179-185. doi: 10.1007/s11010-009-0032-6                                                                       | Original | Brazil       |
| 29 | 2009 | Teodoro AJ, Perrone D, Martucci RB, Borojevic R. Lycopene isomerisation and storage in an in vitro model of murine hepatic stellate cells. <i>Eur J Nutr.</i> 2009;48(5):261-268. doi: 10.1007/s00394-009-0001-6                                                                                                                      | Original | Brazil       |
| 30 | 2010 | Berres ML, Koenen RR, Rueland A, Zaldivar MM, Heinrichs D, Sahin H, Schmitz P, Streetz KL, Berg T, Gassler N, Weiskirchen R, Proudfoot A, Weber C, Trautwein C, Wasmuth HE. Antagonism of the chemokine Ccl5 ameliorates experimental liver fibrosis in mice. <i>J Clin Invest.</i> 2010;120(11):4129-4140. doi: 10.1172/JCI41732     | Original | Germany      |
| 31 | 2010 | Andrade CM, Wink MR, Margis R, Borojevic R, Battastini AM, Guma FC. Changes in E-NTPDase 3 expression and extracellular nucleotide hydrolysis during the myofibroblast/lipocyte differentiation. <i>Mol Cell Biochem.</i> 2010;339(1-2):79-87. doi: 10.1007/s11010-009-0371-3                                                         | Original | Brazil       |
| 32 | 2011 | Gamarra ML, Albuquerque MCM, Teodore AJ, Martucci RB, Borojevic R, Camara FP, Romanos MTV, Santos N. Susceptibility of a continuous murine cell line (GRX) to viral infection. <i>Rev Pan-Amaz Saude</i> 2011;2:65-69. doi: 10.5123/S2176-62232011000200009                                                                           | Original | Brazil       |
| 33 | 2011 | Baldo G, Kretzmann NA, Tieppo J, Filho GP, Cruz CU, Meurer L, da Silveira TR, dos Santos JL, Marroni NP, Giugliani R, Matte U. Bone marrow cells reduce collagen deposition in the rat model of common bile duct ligation. <i>J Cell Sci Ther</i> 2011;2:112. doi:10.4172/2157-7013.1000112                                           | Original | Brazil       |
| 34 | 2011 | Scholten D, Al-samman M, Sahin H, Trautwein C, Wasmuth HE. CXCR3 ligands induce expression of CXCL1 (KC/murine IL8 homolog) in mouse hepatic stellate cells. <i>J Cell Sci Ther</i> 2011;S5. doi: 10.4172/2157-7013.S5-00                                                                                                             | Original | Germany      |
| 35 | 2011 | Stefano JT, Cogliati B, Santos F, Lima VM, Mazo DC, Matte U, Alvares-da-Silva MR, Silveira TR, Carrilho FJ, Oliveira CP. S-Nitroso-N-acetylcysteine induces de-differentiation of activated hepatic stellate cells and promotes antifibrotic effects in vitro. <i>Nitric Oxide</i> 2011;25(3):360-365. doi: 10.1016/j.niox.2011.07.00 | Original | Brazil       |
| 36 | 2012 | O Al-Harbi N, Bahashwan SA, Aboonq MS, Ramadan MA, Bahashwan AA. Reversal of liver fibrosis in chronic murine Schistosomiasis mansoni by Safironil/Praziquantel. <i>Trop J Pharm Res.</i> 2012; 11: 537-543. doi: 10.4314/tjpr.v11i4.3                                                                                                | Original | Saudi Arabia |
| 37 | 2012 | Nellen A, Heinrichs D, Berres ML, Sahin H, Schmitz P, Proudfoot AE, Trautwein C, Wasmuth HE. Interference with oligomerization and glycosaminoglycan binding of the chemokine CCL5 improves experimental liver injury. <i>PLoS One.</i> 2012;7(5):e36614. doi: 10.1371/journal.pone.0036614                                           | Original | Germany      |
| 38 | 2012 | de Moraes CMB, Melo DA, Santos RC, Bitencourt S, Mesquita FC, dos Santos de Oliveira F, Rodriguez-Carballo E, Bartrons R, Rosa JL, Ventura FP, Rodrigues de Oliveira J. Antiproliferative effect of catechin in GRX cells. <i>Biochem Cell Biol.</i> 2012;90(4):575-584. doi: 10.1139/o2012-010                                       | Original | Brazil       |

|    |      |                                                                                                                                                                                                                                                                                                                                                                      |          |         |
|----|------|----------------------------------------------------------------------------------------------------------------------------------------------------------------------------------------------------------------------------------------------------------------------------------------------------------------------------------------------------------------------|----------|---------|
| 39 | 2012 | Bitencourt S, de Mesquita FC, Caberlon E, da Silva GV, Basso BS, Ferreira GA, de Oliveira JR. Capsaicin induces de-differentiation of activated hepatic stellate cell. <i>Biochem Cell Biol.</i> 2012;90(6):683-690. doi: 10.1139/o2012-026                                                                                                                          | Original | Brazil  |
| 40 | 2013 | Meurer SK, Alsamman M, Sahin H, Wasmuth HE, Kisseleva T, Brenner DA, Trautwein C, Weiskirchen R, Scholten D. Overexpression of endoglin modulates TGF- $\beta$ 1-signalling pathways in a novel immortalized mouse hepatic stellate cell line. <i>PLoS One.</i> 2013;8(2):e56116. doi: 10.1371/journal.pone.0056116                                                  | Original | Germany |
| 41 | 2013 | Heinrichs D, Berres ML, Nellen A, Fischer P, Scholten D, Trautwein C, Wasmuth HE, Sahin H. The chemokine CCL3 promotes experimental liver fibrosis in mice. <i>PLoS One.</i> 2013;8(6):e66106. doi: 10.1371/journal.pone.0066106                                                                                                                                     | Original | Germany |
| 42 | 2013 | Roderburg C, Luedde M, Vargas Cardenas D, Vucur M, Mollnow T, Zimmermann HW, Koch A, Hellerbrand C, Weiskirchen R, Frey N, Tacke F, Trautwein C, Luedde T. miR-133a mediates TGF- $\beta$ -dependent derepression of collagen synthesis in hepatic stellate cells during liver fibrosis. <i>J Hepatol.</i> 2013;58(4):736-742. doi: 10.1016/j.jhep.2012.11.022       | Original | Germany |
| 43 | 2013 | Uribe CC, Dos Santos de Oliveira F, Grossmann B, Kretzmann NA, Reverbel da Silveira T, Giugliani R, Matte U. Cytotoxic effect of amphotericin B in a myofibroblast cell line. <i>Toxicol In Vitro.</i> 2013;27(7):2105-2109. doi: 10.1016/j.tiv.2013.08.005                                                                                                          | Original | Brazil  |
| 44 | 2013 | de Mesquita FC, Bitencourt S, Caberlon E, da Silva GV, Basso BS, Schmid J, Ferreira GA, de Oliveira Fdos S, de Oliveira JR. Fructose-1,6-bisphosphate induces phenotypic reversion of activated hepatic stellate cell. <i>Eur J Pharmacol.</i> 2013;720(1-3):320-325. doi: 10.1016/j.ejphar.2013.09.067                                                              | Original | Brazil  |
| 45 | 2014 | Hammerich L, Bangen JM, Govaere O, Zimmermann HW, Gassler N, Huss S, Liedtke C, Prinz I, Lira SA, Luedde T, Roskams T, Trautwein C, Heymann F, Tacke F. Chemokine receptor CCR6-dependent accumulation of $\gamma\delta$ T cells in injured liver restricts hepatic inflammation and fibrosis. <i>Hepatology</i> 2014;59(2):630-642. doi: 10.1002/hep.26697          | Original | Germany |
| 46 | 2014 | Denardin CC, Parisi MM, Martins LA, Terra SR, Borojevic R, Vizzotto M, Perry ML, Emanuelli T, Guma FT. Antiproliferative and cytotoxic effects of purple pitanga ( <i>Eugenia uniflora</i> L.) extract on activated hepatic stellate cells. <i>Cell Biochem Funct.</i> 2014;32(1):16-23. doi: 10.1002/cbf.2965                                                       | Original | Brazil  |
| 47 | 2014 | Martins LA, Coelho BP, Behr G, Pettenuzzo LF, Souza IC, Moreira JC, Borojevic R, Gottfried C, Guma FC. Resveratrol induces pro-oxidant effects and time-dependent resistance to cytotoxicity in activated hepatic stellate cells. <i>Cell Biochem Biophys.</i> 2014;68(2):247-257. doi: 10.1007/s12013-013-9703-8                                                    | Original | Brazil  |
| 48 | 2014 | de Moraes CMB, Bitencourt S, de Mesquita FC, Mello D, de Oliveira LP, da Silva GV, Lorini V, Caberlon E, de Souza Basso B, Schmid J, Ferreira GA, de Oliveira JR. (+)-Catechin attenuates activation of hepatic stellate cells. <i>Cell Biol Int.</i> 2014;38(4):526-530. doi: 10.1002/cbin.10228                                                                    | Original | Brazil  |
| 49 | 2015 | Martins LAM, Vieira MQ, Ilha M, de Vasconcelos M, Biehl HB, Lima DB, Schein V, Barbé-Tuana F, Borojevic R, Guma FC. The interplay between apoptosis, mitophagy and mitochondrial biogenesis induced by resveratrol can determine activated hepatic stellate cells death or survival. <i>Cell Biochem Biophys.</i> 2015;71(2):657-672. doi: 10.1007/s12013-014-0245-5 | Original | Brazil  |
| 50 | 2015 | Borkham-Kamphorst E, Alexi P, Tihaa L, Haas U, Weiskirchen R. Platelet-derived growth factor-D modulates extracellular matrix homeostasis and remodeling through TIMP-1 induction and attenuation of MMP-2 and MMP-9                                                                                                                                                 | Original | Germany |

|    |      |                                                                                                                                                                                                                                                                                                                                                                                                                                         |          |                               |
|----|------|-----------------------------------------------------------------------------------------------------------------------------------------------------------------------------------------------------------------------------------------------------------------------------------------------------------------------------------------------------------------------------------------------------------------------------------------|----------|-------------------------------|
|    |      | gelatinase activities. Biochem Biophys Res Commun. 2015;457(3):307-313. doi: 10.1016/j.bbrc.2014.12.106                                                                                                                                                                                                                                                                                                                                 |          |                               |
| 51 | 2015 | de Souza IC, Martins LA, de Vasconcelos M, de Oliveira CM, Barbé-Tuana F, Andrade CB, Pettenuzzo LF, Borojevic R, Margis R, Guaragna R, Guma FC. Resveratrol regulates the quiescence-like induction of activated stellate cells by modulating the PPAR $\gamma$ /SIRT1 ratio. J Cell Biochem. 2015;116(10):2304-2312. doi: 10.1002/jcb.2518                                                                                            | Original | Brazil                        |
| 52 | 2016 | Coombes JD, Choi SS, Swiderska-Syn M, Manka P, Reid DT, Palma E, Briones-Orta MA, Xie G, Younis R, Kitamura N, Della Peruta M, Bitencourt S, Dollé L, Oo YH, Mi Z, Kuo PC, Williams R, Chokshi S, Canbay A, Claridge LC, Eksteen B, Diehl AM, Syn WK. Osteopontin is a proximal effector of leptin-mediated non-alcoholic steatohepatitis (NASH) fibrosis. Biochim Biophys Acta 2016;1862(1):135-144. doi: 10.1016/j.bbadis.2015.10.028 | Original | UK                            |
| 53 | 2016 | Yanguas SC, Cogliati B, Willebrords J, Maes M, Colle I, van den Bossche B, de Oliveira CPMS, Andraus W, Alves VAF, Leclercq I, Vinken M. Experimental models of liver fibrosis. Arch Toxicol. 2016;90(5):1025-1048. doi: 10.1007/s00204-015-1543-4                                                                                                                                                                                      | Review   | Belgium                       |
| 54 | 2017 | Senoo H, Mezaki Y, Fujiwara M. The stellate cell system (vitamin A-storing cell system). Anat Sci Int. 2017;92(4):387-455. doi: 10.1007/s12565-017-0395-9                                                                                                                                                                                                                                                                               | Review   | Japan                         |
| 55 | 2017 | Denardin CC, Martins LA, Parisi MM, Vieira MQ, Terra SR, Barbé-Tuana FM, Borojevic R, Vizzotto M, Emanuelli T, Guma FC. Autophagy induced by purple pitanga ( <i>Eugenia uniflora</i> L.) extract triggered a cooperative effect on inducing the hepatic stellate cell death. Cell Biol Toxicol. 2017;33(2):197-206. doi: 10.1007/s10565-016-9366-5                                                                                     | Original | Brazil                        |
| 56 | 2017 | Dias HB, Krause GC, Squizani ED, Lima KG, Schuster AD, Pedrazza L, Basso BS, Martha BA, de Mesquita FC, Nunes FB, Donadio MV, de Oliveira JR. Fructose-1,6-bisphosphate reverts iron-induced phenotype of hepatic stellate cells by chelating ferrous ions. Biometals 2017;30(4):549-558. doi: 10.1007/s10534-017-0025-y                                                                                                                | Original | Brazil                        |
| 57 | 2018 | de Oliveira Mendes Ouriques FG, Caruso PB, da Silva GV, Dias H, Marques JR, Nunes FD, de Abreu Ferreira PM, de Oliveira JR. Antifibrotic effect of <i>pluchea sagittalis</i> (lam.) Cabrera aqueous extract in grx cell lineage. Int J Phytomedicine 2018;10(1):30-38. doi: 10.5138/09750185.1832                                                                                                                                       | Original | Brazil                        |
| 58 | 2018 | Brea R, Motiño O, Francés D, García-Monzón C, Vargas J, Fernández-Velasco M, Boscá L, Casado M, Martín-Sanz P, Agra N. PGE2 induces apoptosis of hepatic stellate cells and attenuates liver fibrosis in mice by downregulating miR-23a-5p and miR-28a-5p. Biochim Biophys Acta Mol Basis Dis. 2018;1864(2):325-337. doi: 10.1016/j.bbadis.2017.11.001                                                                                  | Original | Spain                         |
| 59 | 2018 | Uschner FE, Schueller F, Nikolova I, Klein S, Schierwagen R, Magdaleno F, Gröschl S, Loosen S, Ritz T, Roderburg C, Vucur M, Kristiansen G, Lammers T, Luedde T, Trebicka J. The multikinase inhibitor regorafenib decreases angiogenesis and improves portal hypertension. Oncotarget 2018;9(90):36220-36237. doi: 10.18632/oncotarget.26333                                                                                           | Original | Germany/<br>Denmark/<br>Spain |
| 60 | 2019 | de Souza Basso B, de Mesquita FC, Dias HB, Krause GC, Scherer M, Santarem ER, de Oliveira JR. Therapeutic effect of Baccharis anomala DC. extracts on activated hepatic stellate cells. EXLI J 2019;18:91-105. doi: 10.17179/excli2018-1696                                                                                                                                                                                             | Original | Brazil                        |
| 61 | 2019 | Elias MB , Oliveira FL , Guma FCR , Martucci RB , Borojevic R , Teodoro AJ. Lycopene inhibits hepatic stellate cell activation and modulates cellular lipid storage and signaling. Food Funct. 2019;10(4):1974-1984. doi: 10.1039/c8fo02369g                                                                                                                                                                                            | Original | Brazil                        |
| 62 | 2019 | Ilha M, Moraes KDS, Rohden F, Martins LAM, Borojevic R, Lenz G, Barbé-Tuana F, Guma FCR. Exogenous                                                                                                                                                                                                                                                                                                                                      | Original | Brazil                        |

|    |      |                                                                                                                                                                                                                                                                                                                                      |          |                 |
|----|------|--------------------------------------------------------------------------------------------------------------------------------------------------------------------------------------------------------------------------------------------------------------------------------------------------------------------------------------|----------|-----------------|
|    |      | expression of caveolin-1 is sufficient for hepatic stellate cell activation. J Cell Biochem. 2019;120(11):19031-19043. doi: 10.1002/jcb.29226                                                                                                                                                                                        |          |                 |
| 63 | 2020 | Azzam M, El Safy S, Abdelgelil SA, Weiskirchen R, Asimakopoulou A, de Lorenzi F, Lammers T, Mansour S, Tammam S. Targeting activated hepatic stellate cells using collagen-binding chitosan nanoparticles for siRNA delivery to fibrotic livers. Pharmaceutics 2020;12(6):590. doi: 10.3390/pharmaceutics12060590                    | Original | Egypt / Germany |
| 64 | 2020 | Winkler I, Bitter C, Winkler S, Weichenhan D, Thavamani A, Hengstler JG, Borkham-Kamphorst E, Kohlbacher O, Plass C, Geffers R, Weiskirchen R, Nordheim A. Identification of Ppary-modulated miRNA hubs that target the fibrotic tumor microenvironment. Proc Natl Acad Sci U S A. 2020;117(1):454-463. doi: 10.1073/pnas.1909145117 | Original | Germany         |
| 65 | 2020 | Hübbers A, Hennings J, Lambertz D, Haas U, Trautwein C, Nevzorova YA, Sonntag R, Liedtke C. Pharmacological inhibition of cyclin-dependent kinases triggers anti-fibrotic effects in hepatic stellate cells in vitro. Int J Mol Sci. 2020;21(9):3267. doi: 10.3390/ijms21093267                                                      | Original | Germany         |
| 66 | 2021 | Ribera J, Vilches C, Sanz V, de Miguel I, Portolés I, Córdoba-Jover B, Prat E, Nunes V, Jiménez W, Quidant R, Morales-Ruiz M. Treatment of hepatic fibrosis in mice based on targeted plasmonic hyperthermia. ACS Nano. 2021;15(4):7547-7562. doi: 10.1021/acsnano.1c00988                                                           | Original | Spain           |
| 67 | 2021 | Awan T, Babendreyer A, Wozniak J, Alvi AM, Sterzer V, Cook L, Bartsch JW, Liedtke C, Yildiz D, Ludwig A. Expression of the Metalloproteinase ADAM8 is upregulated in liver inflammation models and enhances cytokine release <i>in vitro</i> . Mediators Inflamm. 2021;2021:6665028. doi: 10.1155/2021/6665028                       | Original | Germany         |
| 68 | 2021 | de Oliveira CM, Martins LAM, de Sousa AC, Moraes KDS, Costa BP, Vieira MQ, Coelho BP, Borojevic R, de Oliveira JR, Guma FCR. Resveratrol increases the activation markers and changes the release of inflammatory cytokines of hepatic stellate cells. Mol Cell Biochem. 2021;476(2):649-661. doi: 10.1007/s11010-020-03933-1        | Original | Brazil          |
| 69 | 2021 | Arif E, Wang C, Swiderska-Syn MK, Solanki AK, Rahman B, Manka PP, Coombes JD, Canbay A, Papa S, Nihalani D, Aspichueta P, Lipschutz JH, Syn WK. Targeting myosin 1c inhibits murine hepatic fibrogenesis. Am J Physiol Gastrointest Liver Physiol. 2021;320(6):G1044-G1053. doi: 10.1152/ajpgi.00105.2021                            | Original | Spain/ USA      |
| 70 | 2021 | Awan T, Babendreyer A, Wozniak J, Alvi AM, Sterzer V, Cook L, Bartsch JW, Liedtke C, Yildiz D, Ludwig A. Expression of the Metalloproteinase ADAM8 Is Upregulated in Liver Inflammation Models and Enhances Cytokine Release In Vitro. Mediators Inflamm. 2021;2021:6665028. doi: 10.1155/2021/6665028                               | Original | Germany         |
