# Supplementary material for: Genetic and Molecular Characterization of the Immortalized Murine Hepatic Stellate Cell Line GRX
Source: MDPI journal article supplement (doi:10.3390/cells11091504), 2022-04-30
Supplement: s1 [file Table S2.pdf › Table S2.pdf]

**Table S2.** Antibodies used in Western blot analysis

| Antibody                        | Cat.-no.    | Company                                                | Expected size (kDa) | Dilution | Clonality |
|---------------------------------|-------------|--------------------------------------------------------|---------------------|----------|-----------|
| $\alpha$ -SMA                   | CBL171-I    | Sigma-Aldrich, Taufkirchen, Germany                    | 45                  | 1:1,000  | m mAb     |
| $\alpha$ -tubulin (B-7)         | sc-5286     | Santa Cruz Biotech., Santa Cruz, CA, USA               | 55                  | 1:1,000  | m mAb     |
| $\beta$ -actin                  | A5441       | Sigma-Aldrich                                          | 43                  | 1:10,000 | m mAb     |
| BST2                            | MBS9605302  | MyBioSource, San Diego, CA, USA                        | 22                  | 1:1,000  | p rAb     |
| Caveolin-1                      | #3238       | Cell Signaling Technology, Frankfurt am Main, Germany  | 21,24               | 1:1,000  | r pAb     |
| Col I                           | NB600-408   | Novus Biologicals, Wiesbaden Nordenstadt, Germany      | 139                 | 1:1,000  | r mAb     |
| Col III                         | 22734-1-AP  | Proteintech, Manchester, UK                            | 139                 | 1:1,000  | r mAb     |
| Col IV                          | ab6586      | Abcam, Berlin, Germany                                 | 139                 | 1:1,000  | r pAb     |
| Desmin (D93F5)                  | #5332       | Cell Signaling                                         | 53                  | 1:1,000  | r mAb     |
| E-Cadherin                      | AP20195PU-N | OriGene Technologies GmbH, Herford, Germany            | 130, 98             | 1:500    | r pAb     |
| Fibronectin                     | AB1954      | Sigma-Aldrich                                          | 262                 | 1:3,000  | r pAb     |
| GAPDH (6C5)                     | sc-32233    | Santa Cruz Biotech.                                    | 37                  | 1:1,000  | m mAb     |
| HNF-4 $\alpha$ (C-19)           | sc-6556     | Santa Cruz Biotech.                                    | 54                  | 1:750    | p gAb     |
| IL-6                            | AF-406-NA   | R&D Systems, Wiesbaden, Germany                        | 20-38               | 1:500    | g pAb     |
| Transferrin                     | 17435-1-AP  | Proteintech, Manchester, UK                            | 77                  | 1:1,000  | r pAb     |
| Vimentin                        | ab92547     | Abcam                                                  | 54                  | 1:3,000  | r mAb     |
| MLV (p30)                       | ABIN956413  | Antibodies-online GmbH, Aachen, Germany                | 30                  | 1:1,000  | m mAb     |
| goat anti-rabbit IgG (H+L), HRP | #31460      | Invitrogen, ThermoFisher Scientific, Schwerte, Germany | -                   | 1:5,000  | g         |
| mouse anti-goat IgG (H+L), HRP  | #31400      | Invitrogen                                             | -                   | 1:5,000  | m         |
| goat anti-mouse IgG (H+L), HRP  | #31430      | Invitrogen                                             | -                   | 1:5,000  | r         |

Abbreviations used are: g, goat; m, mouse; mAb, monoclonal antibody; pAb, polyclonal antibody; r, rabbit.
