# Supplementary material for: Genetic and Molecular Characterization of the Immortalized Murine Hepatic Stellate Cell Line GRX
Source: MDPI journal article supplement (doi:10.3390/cells11091504), 2022-04-30
Supplement: s1 [file Table S3.pdf › Table S3.pdf]

**Table S3.** Overview of virus substrates used in this study

|             |                                                       |
|-------------|-------------------------------------------------------|
| <b>HIV</b>  | U5HIVB: ACTGCTAGAGATTTTCCACACTGACTAAA                 |
|             | 5' amine-U5HIVA: Am-TTTAGTCAGTGTGGAAAACCTCTAGCAGT     |
| <b>MLV</b>  | U5MLVB: AATGAAAGACCCCCGCTGACGGGTAGTCAA                |
|             | 5' amine U5MLVA: Am-TTGACTACCCGTCAGCGGGGGTCTTTCATT    |
| <b>MMTV</b> | U5MMTVAB: AATGCCGCAGTCGGCCGACCTGAGGGTCACCG            |
|             | 5' amine U5MMTVA: Am-CGGTGACCCTCAGGTCGGCCGACTGCGGCATT |
