# Supplementary material for: Genetic and Molecular Characterization of the Immortalized Murine Hepatic Stellate Cell Line GRX
Source: Cells. 2022 Apr 30;11(9):1504. doi: 10.3390/cells11091504 (PMC9102025; doi:10.3390/cells11091504)
Supplement: Supplementary file 1 [file cells-11-01504-s001.zip]

Archive with 4 entries (4 files):
- Supplementary Figures.pdf
- Table S1.pdf
- Table S2.pdf
- Table S3.pdf
